# Supplementary material for: Solid-state investigation on a new dimorphic substituted N-salicylidene compound: insights into its thermochromic behaviour
Source: Royal Society of Chemistry journal article supplement (doi:10.1039/c5ce00283d), 2015-01-01
Supplement: c5ce00283d1.pdf [file c5ce00283d1.pdf]

**Electronic Supplementary Information.** Additional table T1 and figures S1, S2, S3A, S3B, S3C and S4 are presented here. X-ray crystallographic information files (CIFs) are also available for the two polymorphic forms of the compound under study. This information is available free of charge via the Internet at <http://pubs.rsc.org>.

Table T1. Main Crystallographic Data for Low-Temperature SCXRD of Polymorph II.

| <b>LT-Polymorph II</b>   |                                            |                                                               |
|--------------------------|--------------------------------------------|---------------------------------------------------------------|
| <b>Crystal data</b>      | Empirical formula                          | C <sub>14</sub> H <sub>12</sub> N <sub>2</sub> O <sub>4</sub> |
|                          | Fw                                         | 272.26                                                        |
|                          | Crystal system                             | Orthorhombic                                                  |
|                          | Space group                                | Pbca (No. 61)                                                 |
|                          | a, b, c (Å)                                | 12.4915(15)<br>7.5972(14)<br>26.1737(18)                      |
|                          | $\alpha, \beta, \gamma$ (°)                | 90 90 90                                                      |
|                          | V (Å <sup>3</sup> )                        | 2483.9(6)                                                     |
|                          | Z                                          | 8                                                             |
|                          | $\rho_{\text{calcd}}$ (g/cm <sup>3</sup> ) | 1.456                                                         |
|                          | Mu (MoK $\alpha$ ) (/mm)                   | 0.109                                                         |
|                          | F(000)                                     | 1136                                                          |
|                          | Crystal size (mm)                          | 0.40 / 0.35 / 0.20                                            |
|                          | T (K)                                      | 105                                                           |
|                          | <b>Collection data</b>                     | Radiation (Å)                                                 |
| $\theta$ min. & max. (°) |                                            | 3.2 – 29.3                                                    |
| Tot., Uniq., R(int)      |                                            | 9181, 3027, 0.026                                             |
| Obs. data                |                                            | 2561                                                          |
| <b>Refinement</b>        | R[I > 2 $\sigma$ (I)]                      | 0.0419                                                        |
|                          | wR2[all]                                   | 0.1043                                                        |
|                          | GoF                                        | 1.09                                                          |
|                          | Residual density                           | -0.21, 0.27                                                   |

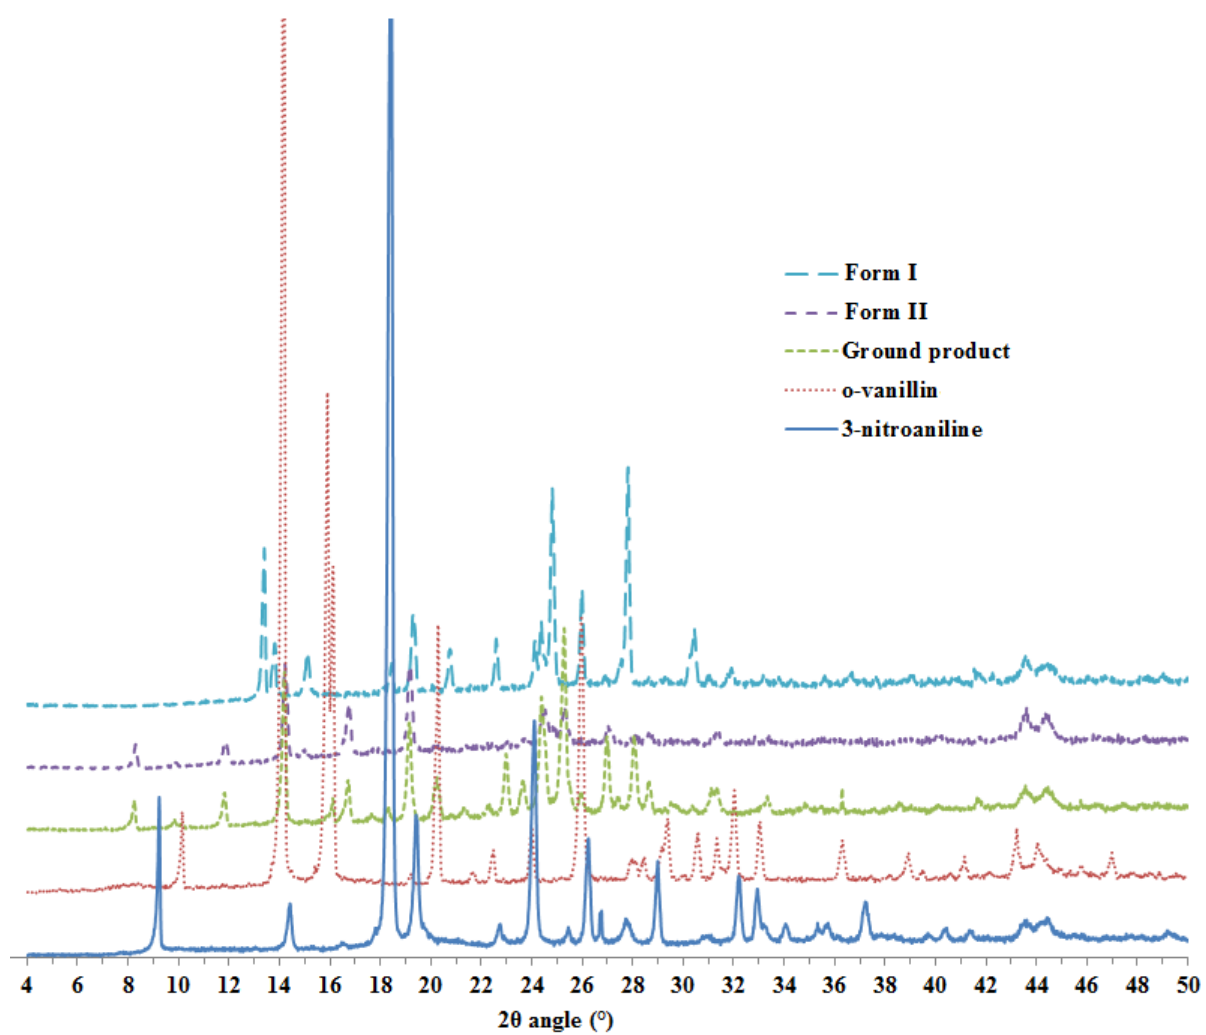

**Figure S1.** PXRD patterns of 3-nitroaniline (blue, on the bottom), o-vanillin (red) and dry-ground samples (green) are compared with experimental patterns for Form I and II, showing that form produced by dry-grinding is Form I.

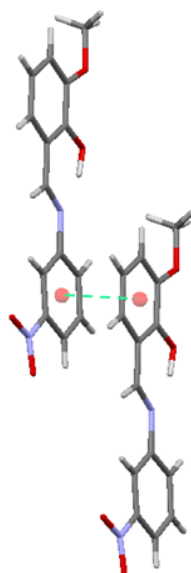

**Figure S2.** Highlighted  $\pi$ - $\pi$  stacking interactions in Form I.

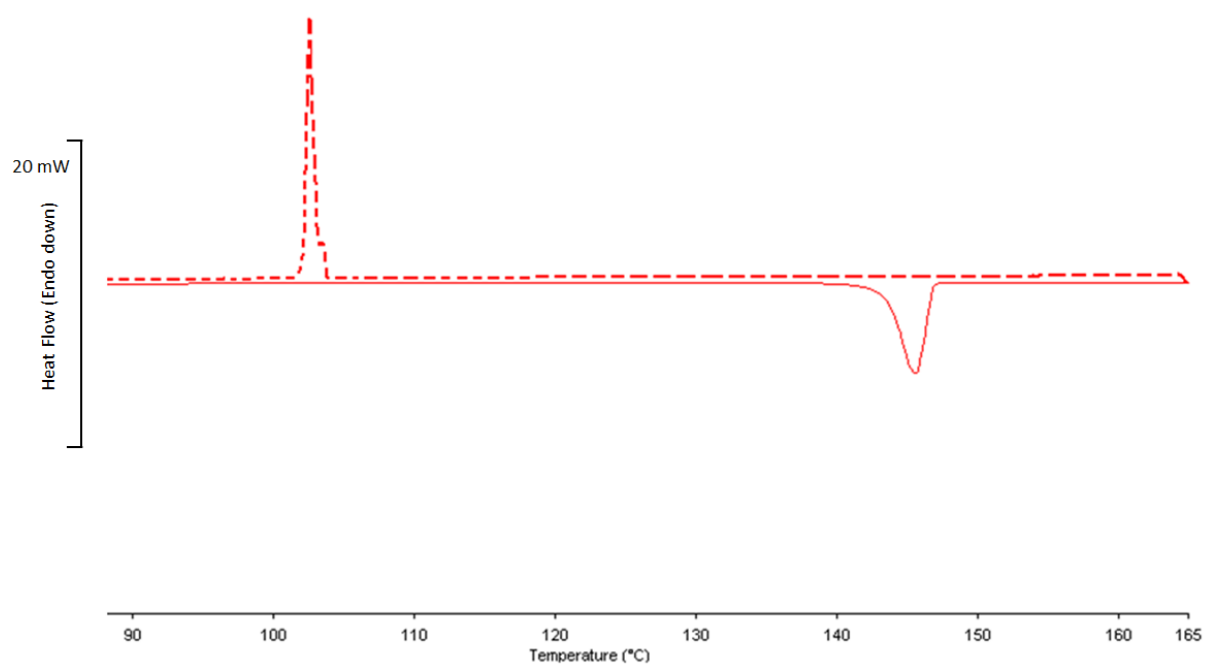

**Figure S3A.** DSC heating/cooling (dotted line) cycle for Form I (5°C/min,  $T_m$ : 143.5°C,  $T_{\text{cryst}}$ : 109.8 °C)

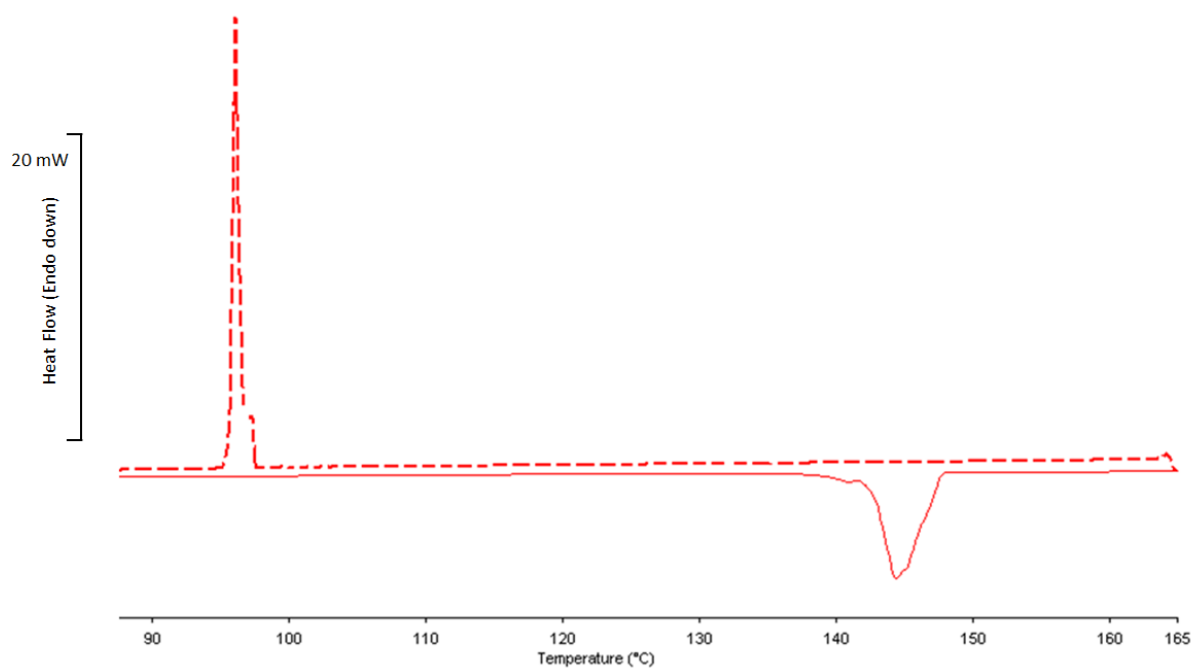

**Figure S3B.** DSC heating/cooling (dotted line) cycle for Form II (5°C/min,  $T_m$ : 144.5°C,  $T_{\text{cryst}}$ : 109.2°C)

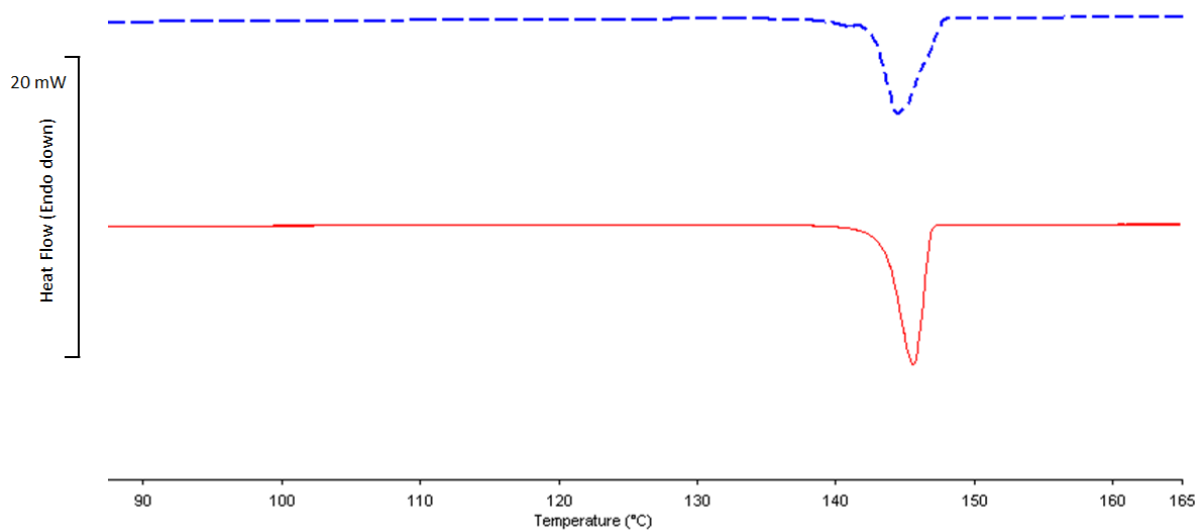

**Figure S3C.** Superposition of second heating step for form II (blue dotted line, (5°C/min,  $T_m$ : 144.1°C) and melting point of Form I.

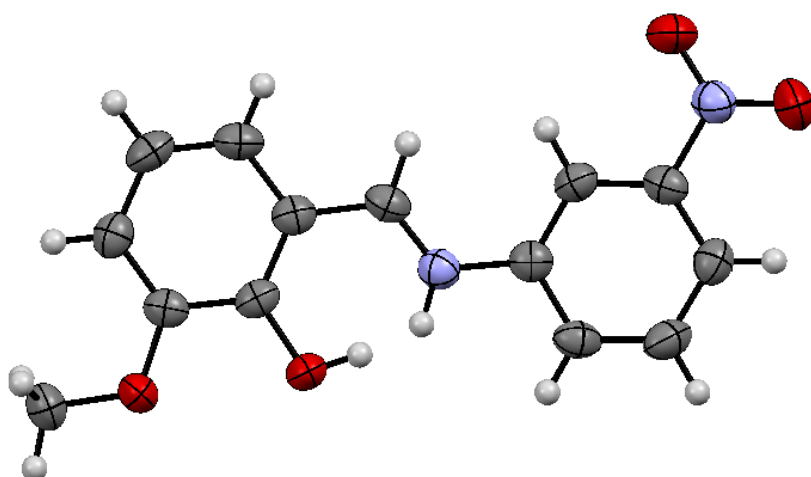

**Figure S4.** ORTEP diagram (50% probability ellipsoids) for compound (**1**) at low-temperature in crystals belonging to polymorph I. An average structure has been refined with highlighting of a weak residual density peak on nitrogen atom.
